# Supplementary material
Source: Royal Society of Chemistry journal article supplement (doi:10.1039/d6tc00912c)
Supplement: d6tc00912c1.pdf [file d6tc00912c1.pdf]

## ***Supplementary Information***

### **A Janus PEDOT/PAM Conductive Hydrogel Enabling Dual-function Uric Acid Detection and Mechanical Monitoring**

**Pingping Wu,<sup>\*a</sup> Qilin Guo,<sup>a</sup> Junchao Liu,<sup>b</sup> Mingwei Chang,<sup>a</sup> Weichao Su,<sup>a</sup> Sijing  
Zhang,<sup>\*a</sup> Yuanzhen Zhou<sup>\*a</sup>**

<sup>a</sup> School of Chemistry and Chemical Engineering, Xi'an University of Architecture  
and Technology, Xi'an 710055, China

E-mail: pingpingwu@xauat.edu.cn; sijingzhang@xauat.edu.cn;  
zhouyuanzhen@xauat.edu.cn

<sup>b</sup> School of Eco-environmental & Chemical Engineering, State Key Lab Water Engn  
Ecol & Environm Arid Area, Xi'an University of Technology, Xi'an 710048, China

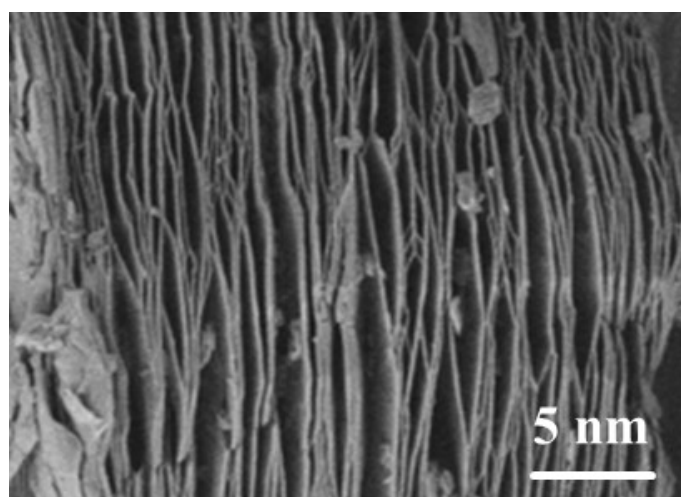

**Fig. S1** SEM image of MXene nanosheets.

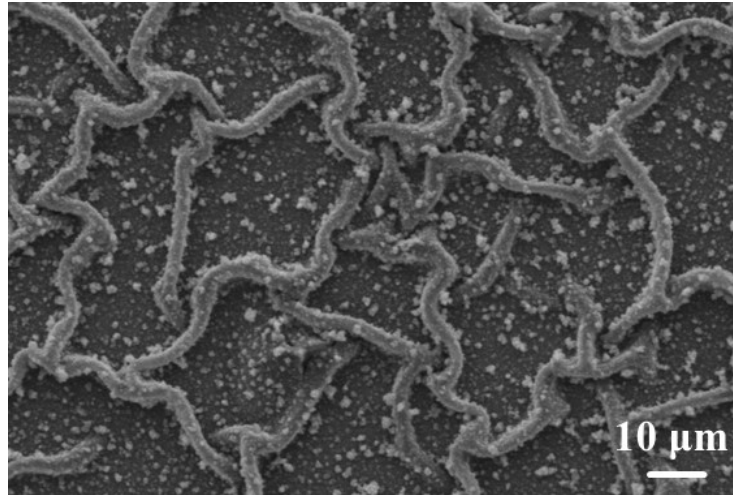

Fig. S2 SEM image of PEDOT film.

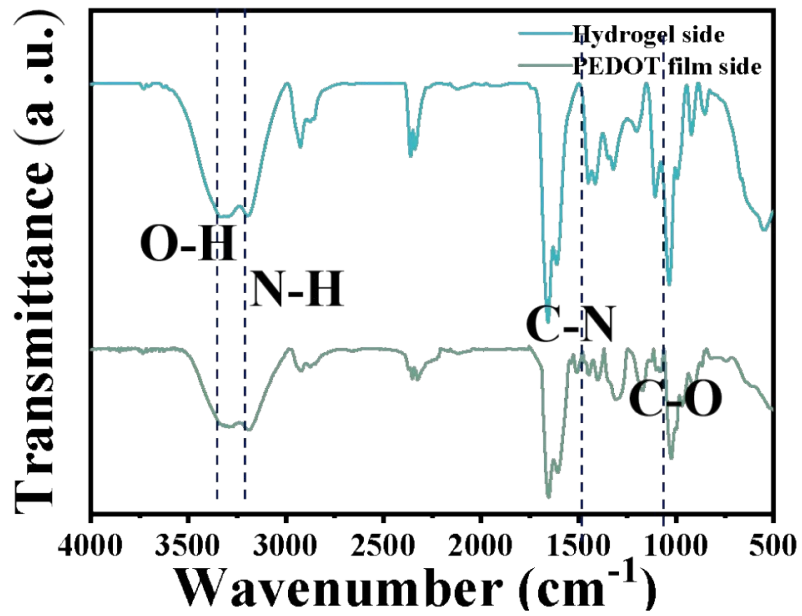

Fig. S3 FTIR of the Janus PEDOT/PAM conductive hydrogel.

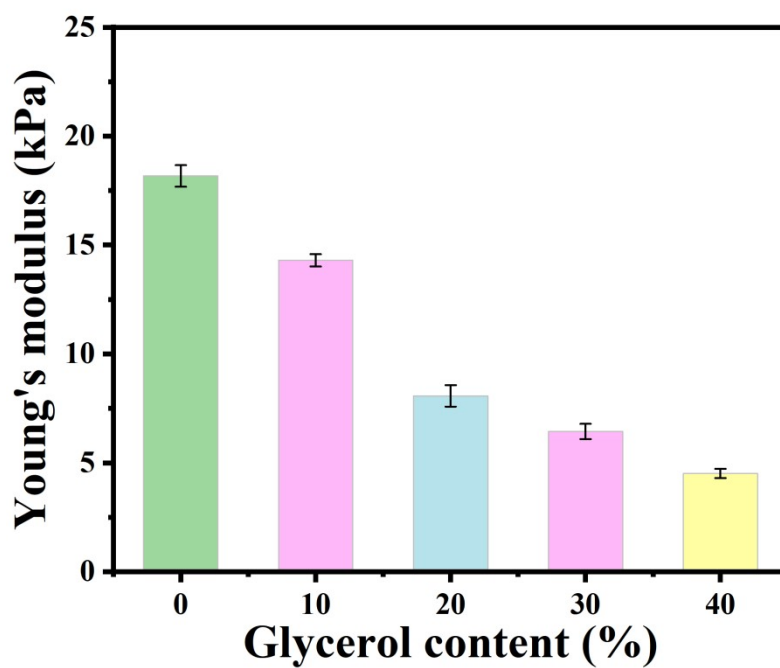

**Fig. S4** Young's modulus of the Janus PEDOT/PAM conductive hydrogel with different glycerol content.

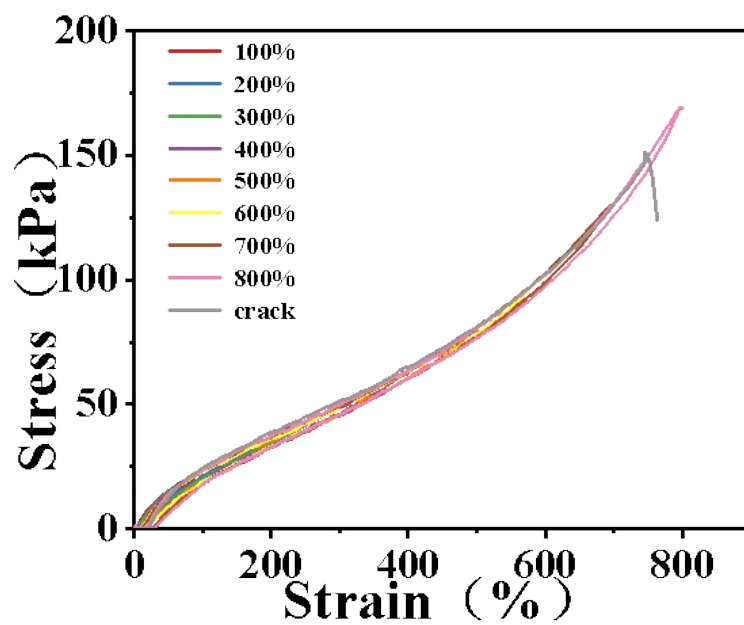

**Fig. S5** Loading-unloading hysteresis curves under tensile strains of 100–900%.

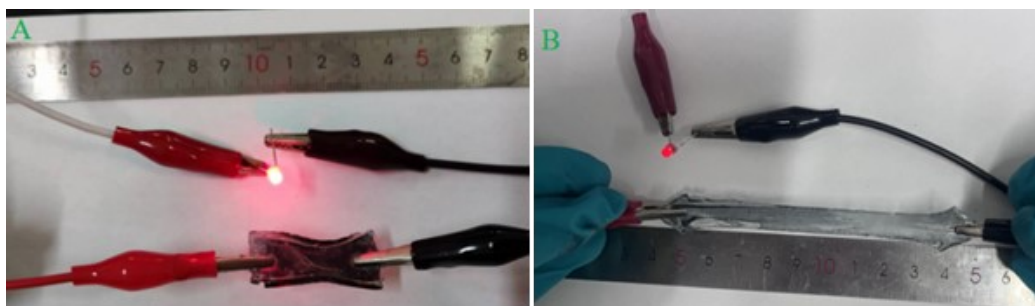

**Fig. S6** (A-B) Janus PEDOT/PAM conductive hydrogel lights LED steadily during deformation.

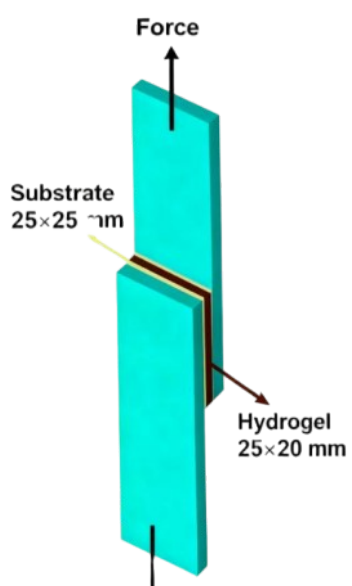

**Fig. S7** Adhesion test schematic.

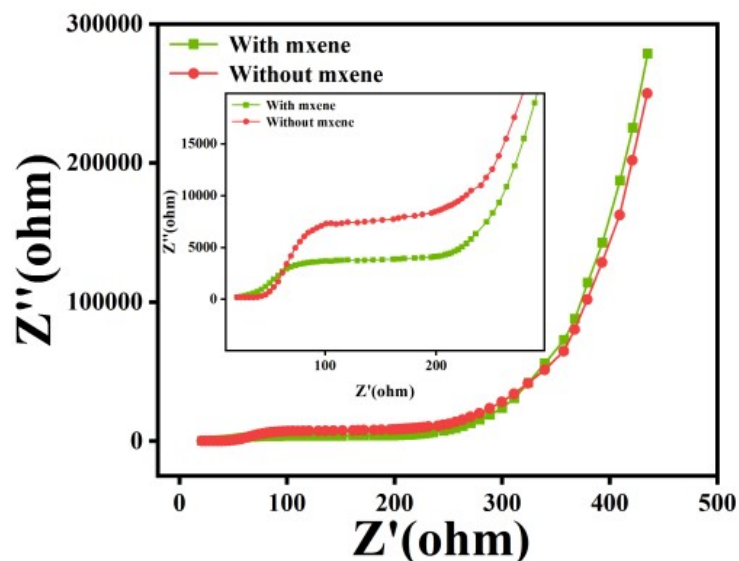

**Fig. S8** EIS comparison of Janus PEDOT/PAM conductive hydrogels with and without MXene addition.

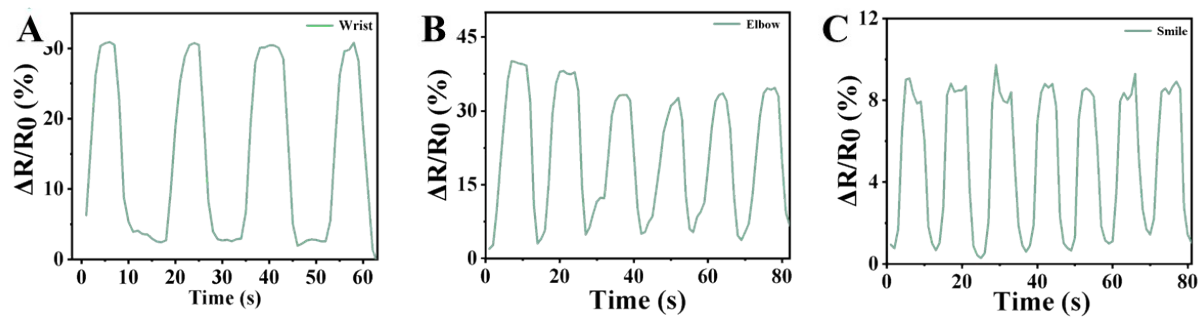

**Fig. S9 (A-C)** Monitoring of wrist, elbow and face vibrations.
